# Supplementary material
Source: publisher figshare collection journal article supplement (https://springernature.figshare.com/ndownloader/files/17084795)
Supplement: Supplementary file [file 17084795]

**Patients admitted from 2012 to 2017 for severe sepsis or septic shock**

n = 1209

**Septic shock patients with pneumonia or peritonitis**

n = 275

**Excluded patients (n = 146)**

- Cardiac arrest (n = 7)
- Other reason for ICU admission (n = 61)
- No mechanical ventilation (n = 55)
- No catecholamine used (n = 18)
- Limitation of invasive therapeutic (n = 5)

**Eligible patients**

n = 129

**Excluded patients before analysis  
(n = 0)**

**Patients included in analysis**

n = 129

39.2% (n = 47) were exposed to  
fluid overload
